# Supplementary material for: Antibiotic use at planned central line removal in reducing neonatal post-catheter removal sepsis: a systematic review and meta-analysis
Source: Frontiers journal article supplement (doi:10.3389/fped.2023.1324242), 2024-01-08
Supplement: Table_2.pdf [file Table_2.pdf]

Supplementary table 2 Risk of bias assessment for enrolled retrospective studies by the modified Newcastle-Ottawa Scale<sup>#</sup>

| Studies      | Selection |        |        |        | Comparability |        | Exposure/Outcomes |        |        |        | Total score | Quality  |
|--------------|-----------|--------|--------|--------|---------------|--------|-------------------|--------|--------|--------|-------------|----------|
|              | Item 1    | Item 2 | Item 3 | Item 4 | Item 1        | Item 2 | Item 1            | Item 2 | Item 3 | Item 4 |             |          |
| Reynold 2015 | 1         | 1      | 1      | 0      | 0             | 1      | 0                 | 0      | 1      | 1      | 7           | Moderate |
| Teibel 2020  | 1         | 1      | 1      | 0      | 1             | 1      | 0                 | 0      | 1      | 1      | 8           | High     |
| Tran 2021    | 1         | 1      | 1      | 0      | 1             | 1      | 1                 | 1      | 1      | 1      | 9           | High     |
| Yan 2021     | 1         | 0      | 1      | 0      | 1             | 1      | 0                 | 0      | 1      | 1      | 7           | Moderate |

<sup>#</sup> Items of the modified Newcastle-Ottawa Scale are listed below.

## NEWCASTLE - OTTAWA QUALITY ASSESSMENT SCALE NON-RANDOMIZED STUDIES

Note: A study can be awarded a maximum of one star for each numbered item.

### Selection

#### 1) Representativeness of the exposed cohort

- a) truly representative of the average neonates requiring central line insertions in the NICU ✱
- b) somewhat representative of the average neonates requiring central line insertions in the NICU
- c) selected group of users, eg nurses, volunteers
- d) no description of the derivation of the cohort

#### 2) Selection of the non-exposed cohort

- a) drawn from the same community as the exposed cohort ✱
- b) drawn from a different source
- c) no description of the derivation of the non-exposed cohort

#### 3) Ascertainment of exposure

- a) secure medical record ✱
- b) structured interview
- c) written self-report
- d) no description

#### 4) Demonstration that outcome of interest was not present at start of study

- a) yes ✱
- b) no

### Comparability

#### Comparability of cohorts on the basis of the design or analysis

- 1) study controls for demographic characteristics including gestational age, sex, birth weight and ethnicity, *etc* ✱
- 2) study controls for characteristics of central lines including types of central lines and length of catheterization, *etc* ✱

### Exposure/Outcomes

#### 1) Ascertainment of exposure

- a) secure record with details ✱

- b) structured interview where blind to case/control status
  - c) interview not blinded to case/control status
  - d) written self-report or medical records
  - e) no description
- 2) Clear definition and report of outcomes
- a) yes, based on consensus clinical criteria ✱
  - b) yes, based on self-definition
  - c) no description
- 3) Was follow-up long enough for outcomes to occur
- a) yes (select an adequate follow up period for outcome of interest) ✱
  - b) no
- 4) Adequacy of follow up of cohorts
- a) complete follow up - all subjects accounted for ✱
  - b) subjects lost to follow up unlikely to introduce bias
  - c) subjects lost to follow up likely to introduce bias and no description of those lost
  - d) no statement
